# Supplementary material
Source: publisher site journal article supplement (https://www.dovepress.com/article/391930)
Supplement: Supplementary file 1 [file get_supplementary_file.php]

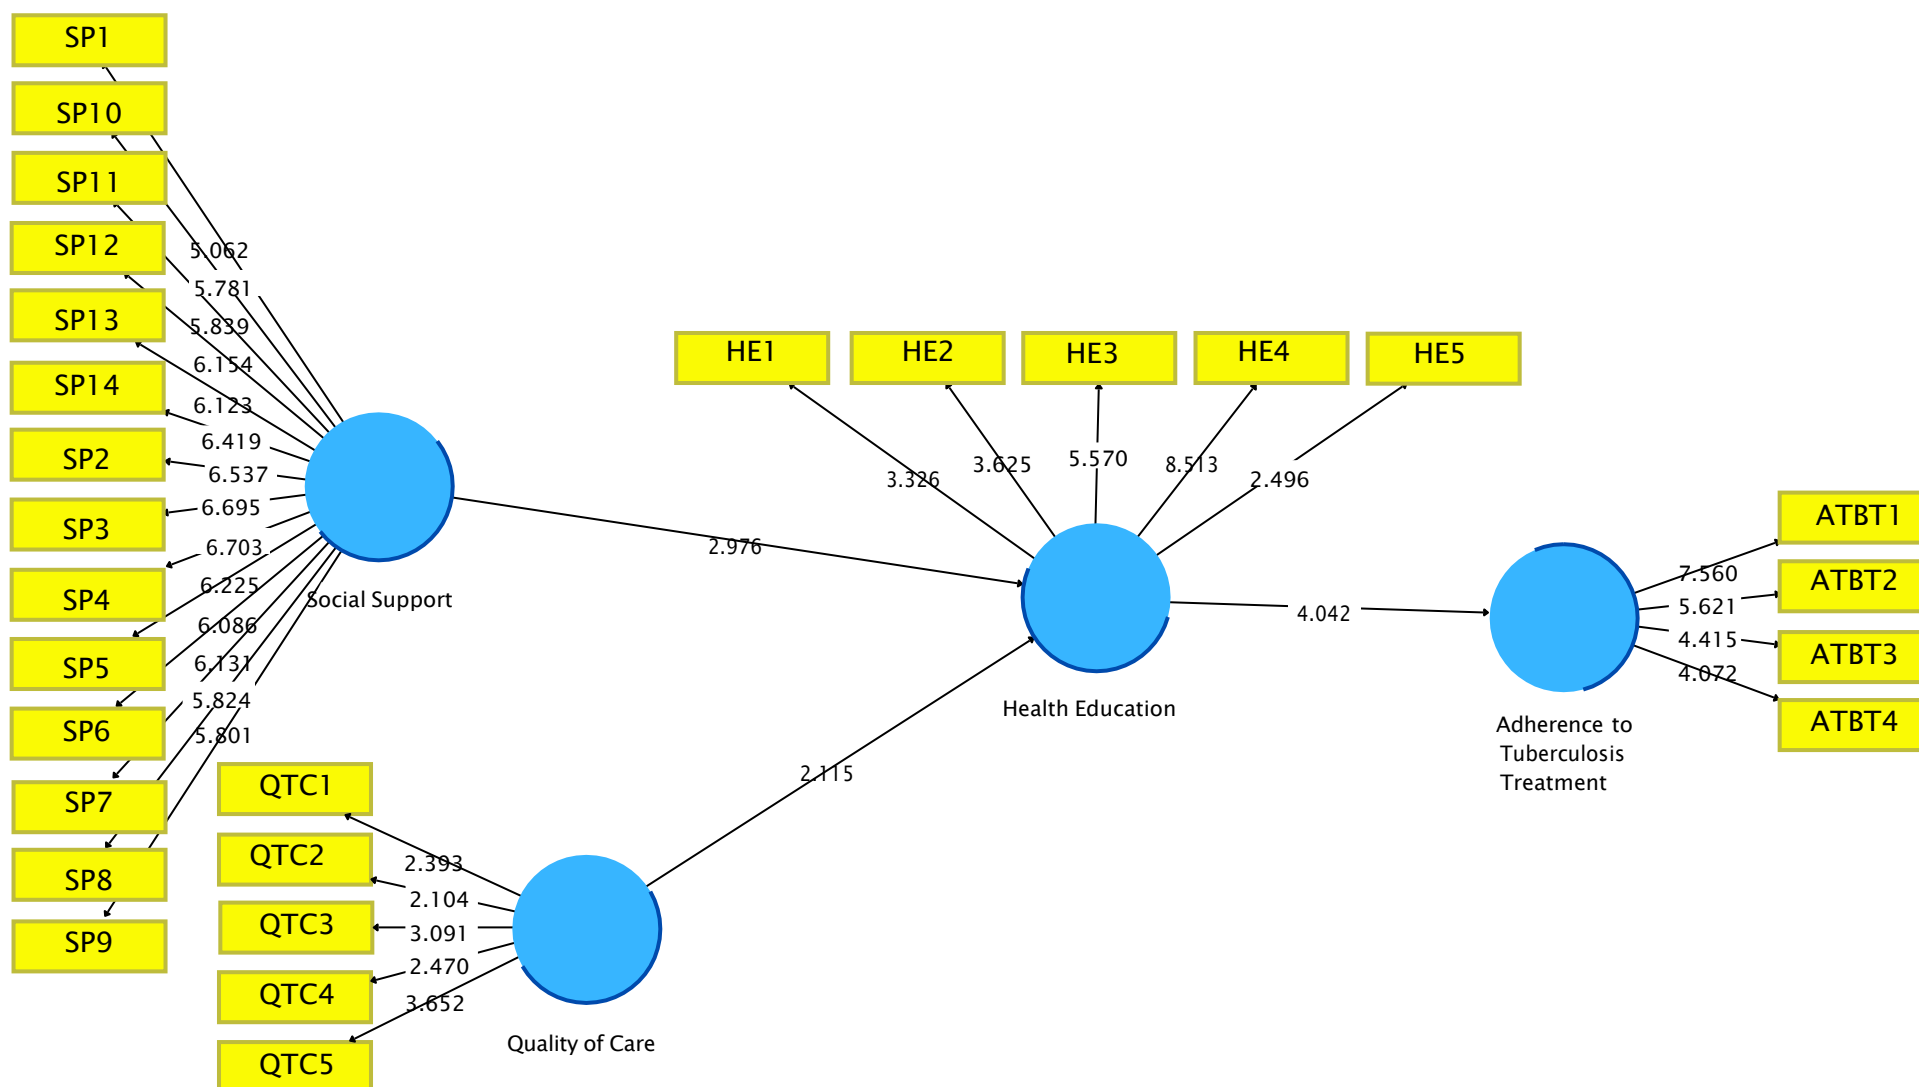

**Figure S1.** Presentation of the results of the mediation model.

Note: QTC= Quality of Care; HE= Health Education; SP= Social Support; ATBT = Adherence to Tuberculosis Treatment.
